# Supplementary material for: Hollow CoOX nanoparticle-embedded N-doped porous carbon as an efficient oxygen electrocatalyst for rechargeable zinc–air batteries
Source: Royal Society of Chemistry journal article supplement (doi:10.1039/d2qm00858k), 2022-01-01
Supplement: d2qm00858k1.pdf [file d2qm00858k1.pdf]

Supplementary Materials

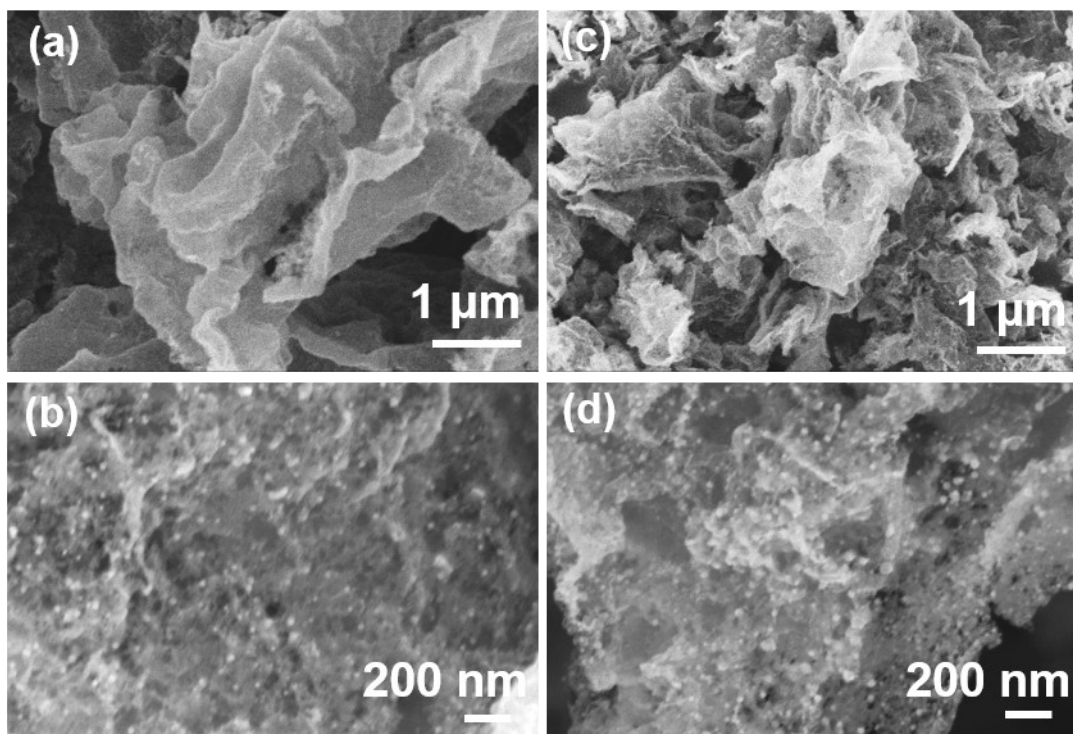

**Fig. S1** SEM images of (a-b) CoO<sub>x</sub>@11-CS and (c-d) CoO<sub>x</sub>@12-CS.

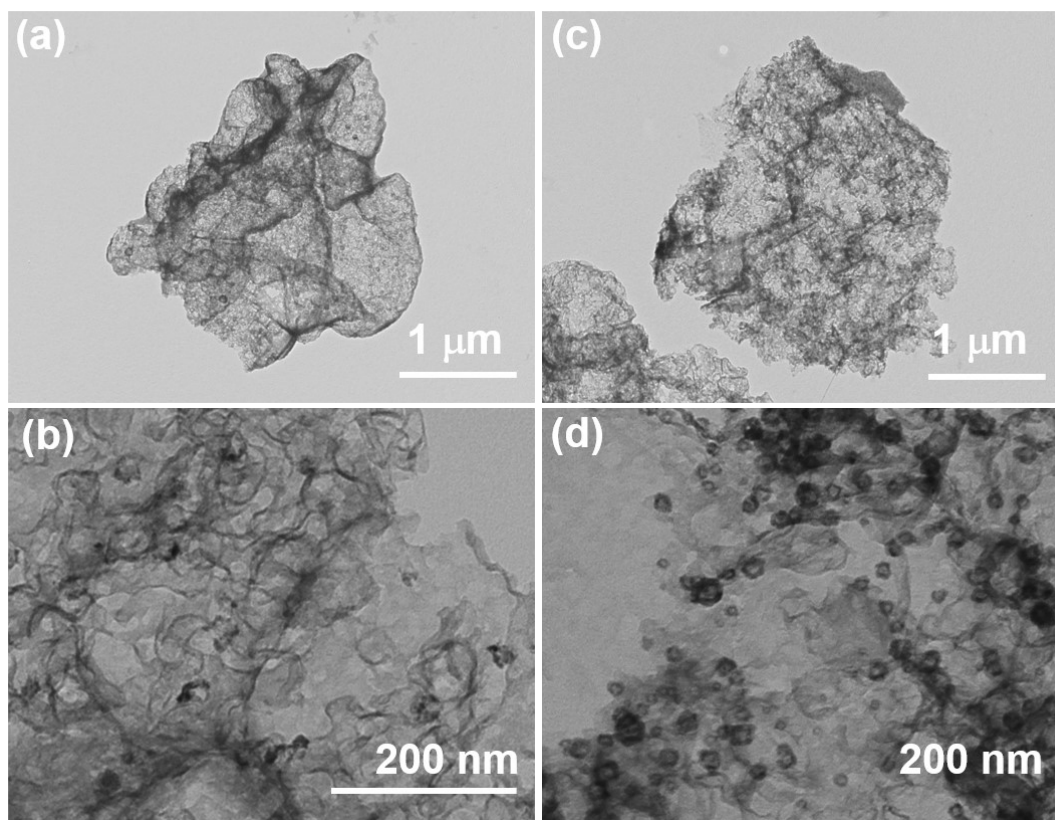

**Fig. S2** TEM images of (a, b) CoO<sub>x</sub>@11-CS and (c, d) CoO<sub>x</sub>@12-CS.

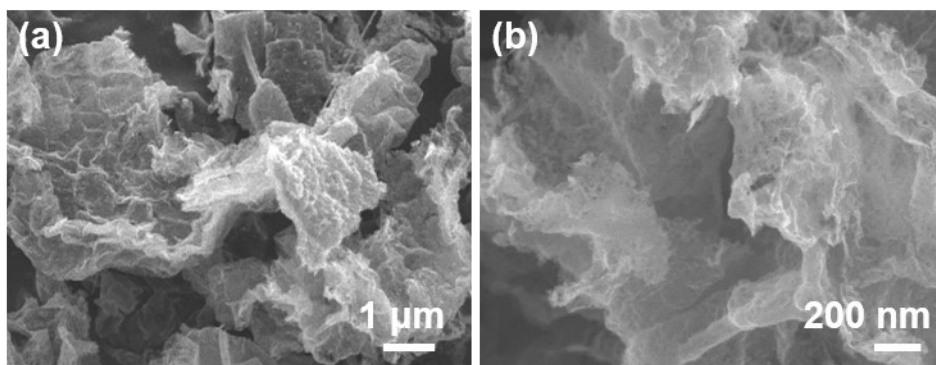

**Fig. S3** SEM images of 12-CS.

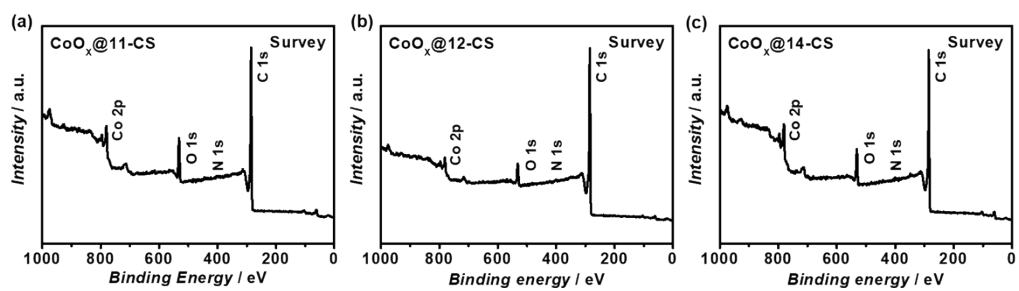

**Fig. S4** XPS survey spectra of CoO<sub>x</sub>@CS.

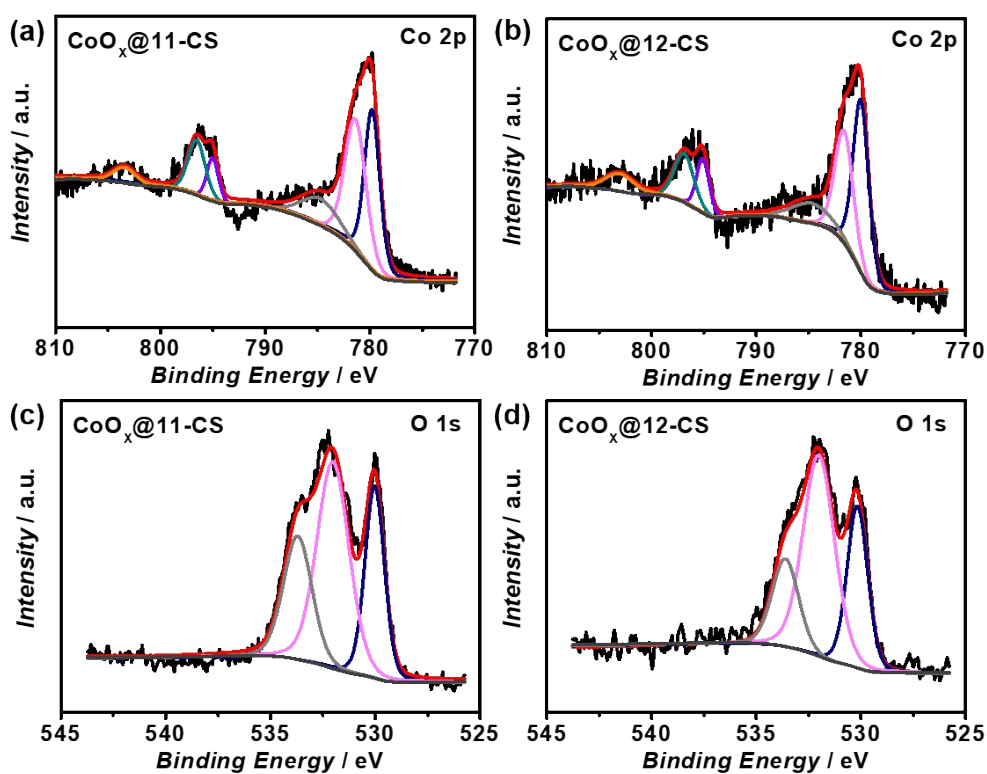

**Fig. S5** High resolution XPS spectra: (a, b) Co 2p region and (c, d) O 1s region.

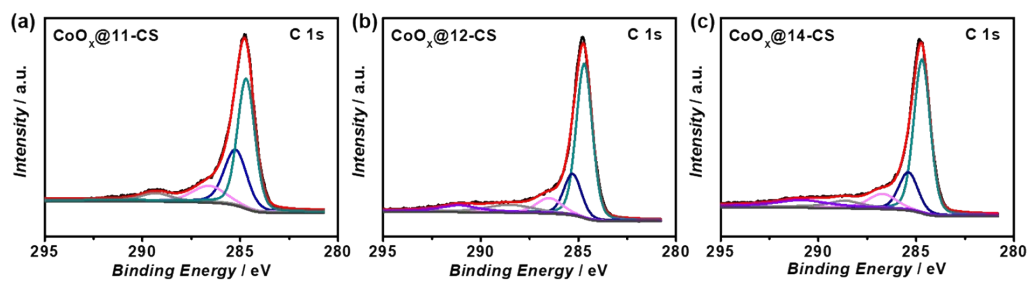

**Fig. S6** High resolution XPS spectra: (a-c) C 1s region.

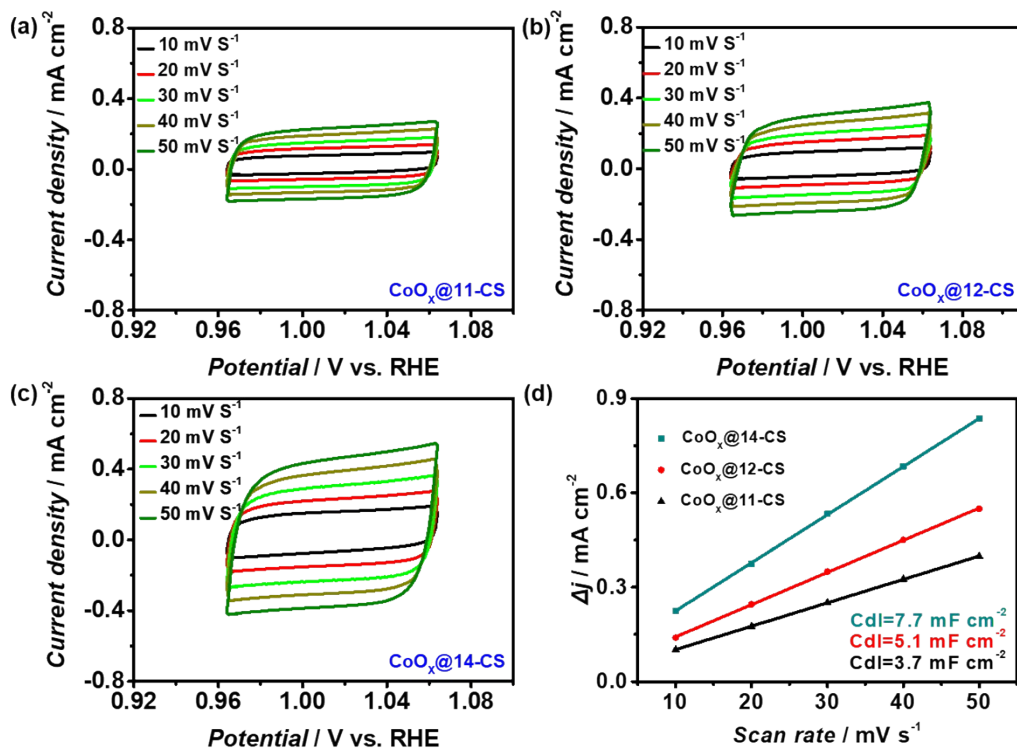

**Fig. S7** (a-c) CV curves at different scan rates in a potential window (0-0.1 V vs. Ag/AgCl) and (d) the corresponding double-layer capacitance calculated.

**Table S1** Performance comparison of cobalt oxide-based catalysts for ORR and OER

| Air catalysts                                                          | $E_{\text{OER}}$<br>( $j=10 \text{ mA cm}^{-2}$ ) | $E_{\text{ORR1/2}}$ | $E = E_{\text{OER}} - E_{\text{ORR1/2}}$ | Power<br>/Energy<br>density<br>( $\text{mW cm}^{-2}$ )/<br>( $\text{Wh kg}_{\text{Zn}}^{-1}$ ) | Stability                               | $\Delta E$                                                            | Ref. |
|------------------------------------------------------------------------|---------------------------------------------------|---------------------|------------------------------------------|------------------------------------------------------------------------------------------------|-----------------------------------------|-----------------------------------------------------------------------|------|
| $\text{Co}_3\text{O}_4$<br>microspheres/<br>Cu nanoparticles<br>hybrid | -                                                 | -                   | 1.0 V                                    | -                                                                                              | 110 h<br>(0.05 mA<br>$\text{cm}^{-2}$ ) | 1.0 V<br>(0.05 mA $\text{cm}^{-2}$ )                                  | 24   |
| CoOx<br>nanoplates                                                     | 1.536 V                                           | -                   | -                                        | -                                                                                              | 10000 s<br>(5 mA<br>$\text{cm}^{-2}$ )  | -                                                                     | 58   |
| SC CoO NRs                                                             | 1.56 V                                            | 0.85 V              | 0.71 V                                   | -                                                                                              | 3000<br>cycles                          | -                                                                     | 53   |
| 3DOM $\text{Co}_3\text{O}_4$                                           | 1.7 V<br>(21.17 mA $\text{cm}^{-2}$ )             | 0.64 V              | -                                        | -                                                                                              | 200 cycles<br>(400 h)                   | 0.85 V<br>(50 mA $\text{cm}^{-2}$ )                                   | 59   |
| $\text{Co}_3\text{O}_4/\text{N-rmGO}$                                  | 1.54 V                                            | 0.83 V              | 0.71 V                                   | -                                                                                              | 25000 s                                 | -                                                                     | 17   |
| Graphene-<br>$\text{Co}_3\text{O}_4$<br>nanocomposite                  | 1.65 V<br>(1.5 mA $\text{cm}^{-2}$ )              | 0.77 V              | -                                        | -                                                                                              | 100 h                                   | 0.97 V<br>(80 mA $\text{g}^{-1}$ )                                    | 14   |
| Ni-Doped CoO<br>nanosheets                                             | -                                                 | -                   | -                                        | 377 $\text{mW cm}^{-2}$                                                                        | 400 h<br>(5 mA<br>$\text{cm}^{-2}$ )    | 0.63 V<br>(charge/discharge<br>density: 2/20<br>mA $\text{cm}^{-2}$ ) | 22   |
| Ultrathin<br>$\text{Co}_3\text{O}_4/\text{CC}$                         | -                                                 | -                   | -                                        | 546 $\text{W h kg}^{-1}$<br>(2 mA $\text{cm}^{-2}$ )                                           | -                                       | 0.92 V<br>(2 mA $\text{cm}^{-2}$ )                                    | 26   |
| $\text{Co}_3\text{O}_4/\text{N-rGO}$<br>nanosheets                     | 1.72 V                                            | 0.79 V              | 0.93 V                                   | 36.1 $\text{mWh cm}^{-3}$                                                                      | 25 h                                    | 0.8 V<br>(3 mA $\text{cm}^{-2}$ )                                     | 27   |
| Ultrathin CoOx<br>layers                                               | 1.6 V                                             | 0.896<br>V          | 0.704 V                                  | 300 $\text{W g}_{\text{cat}}^{-1}$                                                             | 10 h                                    | 0.57 V<br>(6 mA $\text{cm}^{-2}$ )                                    | 28   |
| NC- $\text{Co}_3\text{O}_4/\text{CC}$                                  | 1.588 V                                           | 0.87 V              | 0.718 V                                  | 82.0 $\text{mW cm}^{-3}$<br>(227 mA $\text{cm}^{-3}$ )                                         | 210 h                                   | -                                                                     | 39   |
| CoO-NSC                                                                | 1.7 V                                             | 0.83 V              | 0.86 V                                   | 65 $\text{mW cm}^{-2}$                                                                         | 35 h                                    | 0.88 V                                                                | 45   |
